# Supplementary material
Source: PubMed Central journal article supplement (PMC4258539)
Supplement: NIHMS620542-supplement.pdf [file NIHMS620542-supplement.pdf]

## Cu,Zn-Superoxide Dismutase without Zn is Folded but Catalytically Inactive

Sean Nedd,<sup>a</sup> Rachel Redler,<sup>b</sup> Elizabeth A. Proctor,<sup>b,c</sup> Nikolay V. Dokholyan,<sup>b,c,d,e\*</sup> Anastassia N. Alexandrova<sup>a,f\*</sup>

<sup>a</sup>*Department of Chemistry and Biochemistry, University of California, Los Angeles, CA 90095*

<sup>b</sup>*Department of Biochemistry and Biophysics, University of North Carolina, Chapel Hill, NC 27599*

<sup>c</sup>*Curriculum in Bioinformatics and Computational Biology, University of North Carolina, Chapel Hill, NC*

<sup>d</sup>*Program in Molecular and Cellular Biophysics, University of North Carolina, Chapel Hill, NC*

<sup>e</sup>*Center for Computational and Systems Biology, University of North Carolina, Chapel Hill, NC*

<sup>f</sup>*California NanoSystems Institute, 570 Westwood Plaza, Building 114, Los Angeles, CA 90095, USA.*

### Supporting Information

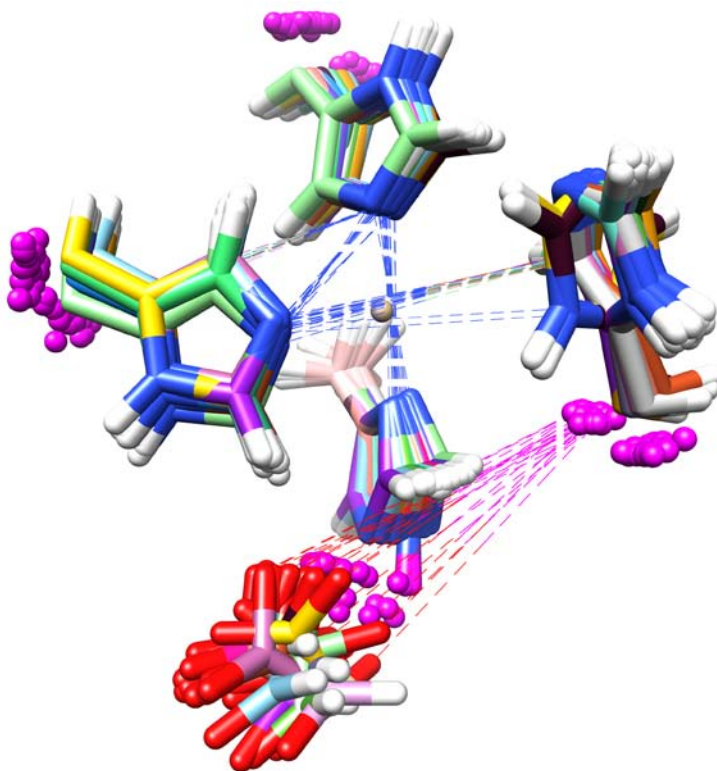

**Figure S1.** Overlaid structures of the active site of Zn-less WT-SOD1 from the QM/DMD iterations 20-50. The center atom is Cu, and clockwise from the bottom the residues are D124, H63, H48, H120, and H46. The purple atoms are added hydrogens added during the QM phases of QM/DMD. The dashed lines represent the position of the residues along the backbone of the SOD1 variant.

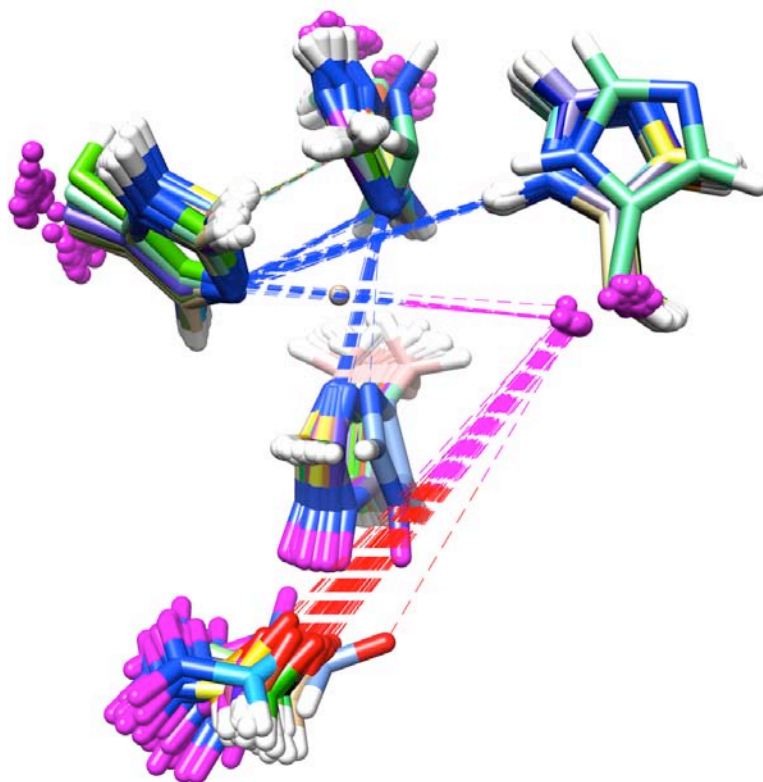

**Figure S2.** Overlaid structures of the active site of Zn-less D124N-SOD1 from the QM/DMD iterations 50-100. The center atom is Cu, and clockwise from the bottom the residues are D124, H63, H48, H120, and H46. The purple atoms are added hydrogens added during the QM phases of QM/DMD. The dashed lines represent the position of the residues along the backbone of the SOD1 variant.

**XYZ coordinates for SOD1 structures with Natural Bond Order partial charges in the 5<sup>th</sup> column.**

Structures were obtained from RI-TPSS/def2-SVP (def2-TZVPP for Cu and Zn), and charges were obtained from single point energy calculations using RI-TPSSH. A suggested viewing option is to save the xyz coordinates in a .xyz file and open using the Jmol program.

The SOD1 variants are wildtype-SOD1 (WT-SOD1), Zn-deficient WT-SOD1, and the Zn-deficient D124N-SOD1.

WT-SOD1

|   |             |            |             |          |
|---|-------------|------------|-------------|----------|
| H | 98.0259725  | 98.4159724 | 99.6329720  | 0.26494  |
| C | 97.3719727  | 97.4519726 | 99.1939721  | -0.66369 |
| C | 96.0391908  | 97.9926152 | 98.7737200  | 0.12448  |
| N | 95.2415207  | 97.3230981 | 97.8542726  | -0.65140 |
| C | 95.3866574  | 99.1694234 | 99.1031499  | -0.02611 |
| C | 94.1422296  | 98.0550484 | 97.6505442  | 0.26422  |
| N | 94.2016416  | 99.1748244 | 98.3933426  | -0.55652 |
| H | 97.9244745  | 97.0533101 | 98.3275296  | 0.21781  |
| H | 97.3028694  | 96.6825285 | 99.9814162  | 0.23847  |
| H | 95.6821775  | 99.9936128 | 99.7504739  | 0.24783  |
| H | 93.3198946  | 97.8300472 | 96.9731178  | 0.23895  |
| H | 93.4499436  | 99.8949448 | 98.2709739  | 0.48220  |
| H | 100.1879719 | 92.5429740 | 100.1579719 | 0.25023  |
| C | 100.0399719 | 92.4159741 | 99.0909722  | -0.64346 |
| C | 98.6955641  | 92.8260838 | 98.5416905  | 0.14444  |
| N | 97.6387983  | 91.9359142 | 98.3694461  | -0.56061 |
| C | 98.2121145  | 94.0191648 | 98.0233500  | -0.04164 |
| C | 96.5926395  | 92.5804049 | 97.7869275  | 0.25894  |
| N | 96.9063980  | 93.8585748 | 97.5678518  | -0.65691 |
| H | 97.6424524  | 90.9543809 | 98.6485653  | 0.44534  |
| H | 100.2369077 | 91.3552714 | 98.8578574  | 0.23234  |
| H | 100.8247136 | 93.0113686 | 98.5954823  | 0.24594  |
| H | 98.7288506  | 94.9742463 | 97.9496825  | 0.23229  |
| H | 95.6279140  | 92.1143040 | 97.5872007  | 0.23292  |
| H | 95.6809731  | 93.0629739 | 102.3949712 | 0.23120  |
| C | 94.9769733  | 93.8629736 | 102.5239712 | -0.64491 |
| C | 94.5885012  | 94.4809435 | 101.2528855 | 0.16701  |
| N | 93.4777318  | 95.3033774 | 101.0571961 | -0.73562 |
| C | 95.2406203  | 94.3139778 | 100.0549495 | -0.05692 |
| C | 93.5140050  | 95.5924853 | 99.7323296  | 0.27465  |
| N | 94.5567681  | 94.9899636 | 99.0774228  | -0.65523 |
| H | 94.0999404  | 93.4545562 | 103.0579420 | 0.23975  |
| H | 95.4313146  | 94.6027184 | 103.2138281 | 0.23934  |
| H | 96.1416711  | 93.7376800 | 99.8720819  | 0.20977  |
| H | 92.7799098  | 96.2145000 | 99.2226844  | 0.21013  |
| H | 88.5719751  | 96.6369729 | 103.9939708 | 0.23432  |

|   |            |             |             |          |
|---|------------|-------------|-------------|----------|
| C | 88.3389752 | 96.8259728  | 102.9569711 | -0.63580 |
| C | 89.3798973 | 97.4646534  | 102.0742236 | 0.15453  |
| N | 90.7007066 | 97.0548488  | 101.8321289 | -0.74402 |
| C | 89.1068898 | 98.5169200  | 101.2101246 | -0.00536 |
| C | 91.1729205 | 97.8699798  | 100.8665157 | 0.25616  |
| N | 90.2379399 | 98.7527174  | 100.4642794 | -0.55711 |
| H | 87.4426118 | 97.4656764  | 102.9429508 | 0.24570  |
| H | 88.0361413 | 95.8530922  | 102.5216691 | 0.22730  |
| H | 88.1924969 | 99.0903507  | 101.0653991 | 0.24877  |
| H | 92.1926142 | 97.8682297  | 100.4857722 | 0.20209  |
| H | 90.3233675 | 99.4469427  | 99.6833934  | 0.47128  |
| H | 93.4499738 | 95.6629731  | 107.1719699 | 0.25183  |
| C | 93.6609737 | 95.1289733  | 106.2529702 | -0.62953 |
| C | 92.4090273 | 94.5143929  | 105.6505287 | 0.16929  |
| N | 91.9577356 | 94.5413336  | 104.3078842 | -0.73463 |
| C | 91.5258286 | 93.7172523  | 106.3574414 | -0.01477 |
| C | 90.8530667 | 93.7839443  | 104.2553886 | 0.26764  |
| N | 90.5661011 | 93.2748095  | 105.4719539 | -0.55071 |
| H | 94.1351099 | 95.8305764  | 105.5561519 | 0.23008  |
| H | 94.3848236 | 94.3271625  | 106.4848193 | 0.23184  |
| H | 91.5186795 | 93.4318331  | 107.4083259 | 0.24886  |
| H | 90.2435427 | 93.6087605  | 103.3686533 | 0.22077  |
| H | 89.7729955 | 92.6742437  | 105.6969465 | 0.44951  |
| H | 95.3269732 | 98.8289722  | 103.4169710 | 0.23935  |
| C | 94.2749735 | 98.6479723  | 103.1949710 | -0.70971 |
| C | 93.5377123 | 98.0804326  | 104.3815015 | 0.82868  |
| O | 93.7695438 | 98.4829199  | 105.5314763 | -0.46441 |
| O | 92.6470111 | 97.1711688  | 104.1574228 | -0.87262 |
| H | 93.8173124 | 99.6170182  | 102.9267987 | 0.24735  |
| H | 94.1958516 | 97.9694872  | 102.3279228 | 0.19821  |
| H | 96.3219730 | 98.7659723  | 92.1559741  | 0.24301  |
| C | 95.4649732 | 98.4989723  | 92.7429740  | -0.64070 |
| C | 95.6049656 | 97.3089202  | 93.6457999  | 0.15623  |
| N | 95.2115937 | 96.0215619  | 93.2951025  | -0.55581 |
| C | 95.9555837 | 97.2058014  | 94.9784623  | -0.03470 |
| C | 95.3105800 | 95.2089424  | 94.3795151  | 0.25992  |
| N | 95.7552380 | 95.9069758  | 95.4277526  | -0.64726 |
| H | 95.2174315 | 99.3791339  | 93.3587515  | 0.24957  |
| H | 94.6223843 | 98.3468477  | 92.0464323  | 0.23780  |
| H | 96.3038447 | 97.9904558  | 95.6459298  | 0.23918  |
| H | 94.8493093 | 95.7466369  | 92.3816459  | 0.44408  |
| H | 95.0335180 | 94.1553732  | 94.3803433  | 0.21929  |
| H | 90.1079747 | 102.0409713 | 95.6749731  | 0.24577  |
| C | 90.8569745 | 102.1209713 | 96.4419729  | -0.71591 |
| C | 91.0348497 | 100.9372784 | 97.3685091  | 0.84956  |
| O | 90.1970982 | 100.6212063 | 98.2609921  | -0.59206 |

|    |             |             |             |          |
|----|-------------|-------------|-------------|----------|
| O  | 92.1229144  | 100.2674042 | 97.2896994  | -0.66230 |
| H  | 91.8255784  | 102.3258745 | 95.9561716  | 0.23302  |
| H  | 90.5814800  | 102.9962196 | 97.0581423  | 0.25147  |
| H  | 98.8329722  | 93.3129738  | 91.6399743  | 0.22031  |
| C  | 99.2459721  | 93.2949738  | 92.6389740  | -0.61643 |
| C  | 99.0247763  | 91.9081658  | 93.2580954  | -0.20327 |
| N  | 99.3743713  | 90.7945834  | 92.3484911  | -0.62864 |
| C  | 100.4605230 | 90.0031994  | 92.4044103  | 0.72844  |
| N  | 101.5315809 | 90.3604589  | 93.1382683  | -0.78962 |
| N  | 100.4628680 | 88.8277825  | 91.7534681  | -0.77559 |
| H  | 98.7060148  | 90.5896561  | 91.6050503  | 0.42659  |
| H  | 102.2903783 | 89.7012629  | 93.3040294  | 0.43733  |
| H  | 101.7279179 | 91.3401788  | 93.3317008  | 0.43133  |
| H  | 101.3285546 | 88.3249998  | 91.5620342  | 0.43964  |
| H  | 99.6062362  | 88.4265201  | 91.3758106  | 0.43462  |
| H  | 100.3193471 | 93.5401795  | 92.5614990  | 0.21909  |
| H  | 98.7575236  | 94.0691553  | 93.2534704  | 0.23051  |
| H  | 99.5958280  | 91.7701848  | 94.1919008  | 0.21907  |
| H  | 97.9603046  | 91.7682390  | 93.5167117  | 0.22613  |
| Cu | 95.5522874  | 95.4350414  | 97.3948809  | 1.14415  |
| Zn | 92.2075757  | 95.9158783  | 102.7332388 | 1.57112  |

#### WT-SOD with superoxide

|   |             |            |             |          |
|---|-------------|------------|-------------|----------|
| H | 98.0259725  | 98.4159724 | 99.6329720  | 0.24609  |
| C | 97.3719727  | 97.4519726 | 99.1939721  | -0.64841 |
| C | 96.0381808  | 97.9489404 | 98.7367974  | 0.12903  |
| N | 95.2580846  | 97.2555626 | 97.8219801  | -0.67579 |
| C | 95.3683785  | 99.1160035 | 99.0737576  | -0.04100 |
| C | 94.1527076  | 97.9820900 | 97.6229354  | 0.25888  |
| N | 94.1863531  | 99.1072817 | 98.3647062  | -0.56614 |
| H | 97.9438804  | 97.0219154 | 98.3556350  | 0.21939  |
| H | 97.2922779  | 96.6989262 | 99.9973522  | 0.23435  |
| H | 95.6512934  | 99.9389348 | 99.7279003  | 0.23776  |
| H | 93.3287308  | 97.7392543 | 96.9531497  | 0.23015  |
| H | 93.4277772  | 99.8146888 | 98.2626429  | 0.47463  |
| H | 100.1879719 | 92.5429740 | 100.1579719 | 0.24365  |
| C | 100.0399719 | 92.4159741 | 99.0909722  | -0.64411 |
| C | 98.6739564  | 92.7677535 | 98.5699693  | 0.12467  |
| N | 97.5686177  | 91.9276089 | 98.6884172  | -0.57944 |
| C | 98.1870812  | 93.8596169 | 97.8598247  | -0.05214 |
| C | 96.4951658  | 92.5266372 | 98.0879306  | 0.20257  |
| N | 96.8393262  | 93.7031682 | 97.5723063  | -0.63111 |
| H | 97.5478531  | 91.0458169 | 99.2015671  | 0.44152  |
| H | 100.2888649 | 91.3666958 | 98.8501498  | 0.23151  |
| H | 100.7877246 | 93.0526627 | 98.5909555  | 0.24428  |
| H | 98.7324402  | 94.7536463 | 97.5569985  | 0.23008  |

|   |            |            |             |          |
|---|------------|------------|-------------|----------|
| H | 95.4865561 | 92.1112527 | 98.0988307  | 0.24096  |
| H | 95.6809731 | 93.0629739 | 102.3949712 | 0.22217  |
| C | 94.9769733 | 93.8629736 | 102.5239712 | -0.63909 |
| C | 94.5089700 | 94.4778205 | 101.2716141 | 0.13307  |
| N | 93.3457335 | 95.2279435 | 101.1204908 | -0.77790 |
| C | 95.1196780 | 94.3688814 | 100.0509758 | -0.06979 |
| C | 93.2978125 | 95.5021062 | 99.7801083  | 0.24811  |
| N | 94.3476890 | 94.9925419 | 99.0996064  | -0.66728 |
| H | 94.1248978 | 93.4498677 | 103.0950890 | 0.23199  |
| H | 95.4498633 | 94.6052472 | 103.1993005 | 0.22546  |
| H | 96.0772713 | 93.9094168 | 99.8395449  | 0.19861  |
| H | 92.4845323 | 96.0476309 | 99.3033276  | 0.20592  |
| H | 88.5719751 | 96.6369729 | 103.9939708 | 0.22930  |
| C | 88.3389752 | 96.8259728 | 102.9569711 | -0.63210 |
| C | 89.3693600 | 97.4881181 | 102.0791276 | 0.14179  |
| N | 90.6971775 | 97.0946256 | 101.8485057 | -0.73840 |
| C | 89.0880842 | 98.5350003 | 101.2172316 | -0.02608 |
| C | 91.1669402 | 97.9126688 | 100.8874032 | 0.25132  |
| N | 90.2232346 | 98.7851266 | 100.4793362 | -0.55960 |
| H | 87.4288569 | 97.4465865 | 102.9420378 | 0.23858  |
| H | 88.0571208 | 95.8477668 | 102.5188424 | 0.22175  |
| H | 88.1709807 | 99.1024946 | 101.0686914 | 0.24119  |
| H | 92.1843092 | 97.9090678 | 100.4993283 | 0.20917  |
| H | 90.2994070 | 99.4765358 | 99.6965465  | 0.46716  |
| H | 93.4499738 | 95.6629731 | 107.1719699 | 0.24436  |
| C | 93.6609737 | 95.1289733 | 106.2529702 | -0.62743 |
| C | 92.4046855 | 94.5075855 | 105.6654619 | 0.16332  |
| N | 91.9417704 | 94.5536909 | 104.3299729 | -0.72097 |
| C | 91.5296175 | 93.7039842 | 106.3712473 | -0.03336 |
| C | 90.8385726 | 93.8002659 | 104.2747560 | 0.26069  |
| N | 90.5590309 | 93.2750475 | 105.4876200 | -0.55555 |
| H | 94.1172573 | 95.8355250 | 105.5495965 | 0.23313  |
| H | 94.3948135 | 94.3341457 | 106.4761917 | 0.22579  |
| H | 91.5286376 | 93.4060584 | 107.4183822 | 0.24115  |
| H | 90.2253648 | 93.6361179 | 103.3884857 | 0.21837  |
| H | 89.7675152 | 92.6731638 | 105.7098449 | 0.44210  |
| H | 95.3269732 | 98.8289722 | 103.4169710 | 0.23443  |
| C | 94.2749735 | 98.6479723 | 103.1949710 | -0.70635 |
| C | 93.5321596 | 98.0923869 | 104.3913208 | 0.82744  |
| O | 93.7855810 | 98.5243800 | 105.5289849 | -0.48284 |
| O | 92.6397141 | 97.1869265 | 104.1762683 | -0.88166 |
| H | 93.8170311 | 99.6128251 | 102.9131522 | 0.24189  |
| H | 94.1981609 | 97.9587502 | 102.3358204 | 0.20291  |
| H | 96.3219730 | 98.7659723 | 92.1559741  | 0.23606  |
| C | 95.4649732 | 98.4989723 | 92.7429740  | -0.63977 |
| C | 95.5390250 | 97.2587754 | 93.5787602  | 0.14278  |

|    |             |             |             |          |
|----|-------------|-------------|-------------|----------|
| N  | 95.0982196  | 96.0096681  | 93.1541092  | -0.56219 |
| C  | 95.8150109  | 97.0837910  | 94.9202537  | -0.03248 |
| C  | 95.0892759  | 95.1575367  | 94.2143669  | 0.26348  |
| N  | 95.5145483  | 95.7864084  | 95.3099404  | -0.65243 |
| H  | 95.2662290  | 99.3537924  | 93.4103965  | 0.24584  |
| H  | 94.6060147  | 98.4327517  | 92.0514243  | 0.23250  |
| H  | 96.1682031  | 97.8208015  | 95.6366518  | 0.23820  |
| H  | 94.7611402  | 95.7921957  | 92.2170299  | 0.43527  |
| H  | 94.7348247  | 94.1297185  | 94.1673128  | 0.21172  |
| H  | 90.1079747  | 102.0409713 | 95.6749731  | 0.23905  |
| C  | 90.8569745  | 102.1209713 | 96.4419729  | -0.71430 |
| C  | 90.9782083  | 100.9390914 | 97.3911557  | 0.84294  |
| O  | 90.1065380  | 100.6802577 | 98.2708074  | -0.59100 |
| O  | 92.0281550  | 100.2143749 | 97.3361346  | -0.65715 |
| H  | 91.8343599  | 102.2802480 | 95.9578809  | 0.22783  |
| H  | 90.6042546  | 103.0155927 | 97.0386530  | 0.24373  |
| H  | 98.8329722  | 93.3129738  | 91.6399743  | 0.21498  |
| C  | 99.2459721  | 93.2949738  | 92.6389740  | -0.63861 |
| C  | 99.2304018  | 91.8818719  | 93.2666482  | -0.21720 |
| N  | 98.2707216  | 91.7413265  | 94.3763397  | -0.61908 |
| C  | 96.9489503  | 91.5502322  | 94.2610160  | 0.73011  |
| N  | 96.3339728  | 91.6420147  | 93.0648551  | -0.79538 |
| N  | 96.2120298  | 91.2276673  | 95.3398693  | -0.80607 |
| H  | 98.6109776  | 91.9483004  | 95.3164509  | 0.42545  |
| H  | 95.4303385  | 91.1911750  | 92.9328713  | 0.43599  |
| H  | 96.8278961  | 91.9581202  | 92.2345316  | 0.42686  |
| H  | 95.2951614  | 91.6989185  | 95.4884471  | 0.44052  |
| H  | 96.7242587  | 91.0886057  | 96.2094819  | 0.40703  |
| H  | 100.2807836 | 93.6645549  | 92.5518875  | 0.24448  |
| H  | 98.6929955  | 94.0118848  | 93.2701145  | 0.22033  |
| H  | 99.0035873  | 91.0979091  | 92.5232719  | 0.22792  |
| H  | 100.2130064 | 91.6256065  | 93.6908038  | 0.24423  |
| Cu | 95.1495216  | 95.2789747  | 97.2635943  | 1.16451  |
| Zn | 92.2027446  | 95.9255726  | 102.7422364 | 1.57352  |
| O  | 93.7283279  | 93.8125345  | 96.5592738  | -0.19484 |
| O  | 93.8884312  | 92.6637638  | 96.0247935  | -0.22898 |

#### Zn-deficient WT-SOD1

|   |            |             |            |          |
|---|------------|-------------|------------|----------|
| H | 98.2329724 | 98.8829722  | 98.8599722 | 0.22888  |
| C | 97.5949726 | 98.1169724  | 98.4249724 | -0.63428 |
| C | 96.7213864 | 98.8360620  | 97.4227107 | 0.10451  |
| N | 96.2947117 | 98.2820308  | 96.2268948 | -0.75001 |
| C | 96.1842989 | 100.1242489 | 97.4824899 | -0.01808 |
| C | 95.5141865 | 99.2438739  | 95.6438935 | 0.23656  |
| N | 95.4308447 | 100.3660516 | 96.3592551 | -0.60062 |
| H | 98.2324354 | 97.3650710  | 97.9278813 | 0.20761  |

|   |             |             |             |          |
|---|-------------|-------------|-------------|----------|
| H | 97.0096650  | 97.6220290  | 99.2217803  | 0.21708  |
| H | 96.3010393  | 100.8752976 | 98.2663025  | 0.21131  |
| H | 94.9921273  | 99.0892923  | 94.6967092  | 0.18495  |
| H | 94.1059183  | 101.2783440 | 96.1294280  | 0.50319  |
| H | 99.5549720  | 93.2789738  | 99.5349721  | 0.24171  |
| C | 99.8049720  | 92.9989739  | 98.5319723  | -0.63526 |
| C | 99.0286227  | 93.7113763  | 97.4835957  | 0.13803  |
| N | 99.3306878  | 93.5945564  | 96.1317291  | -0.56063 |
| C | 97.9370221  | 94.5467254  | 97.5279311  | -0.04019 |
| C | 98.4481300  | 94.3480124  | 95.4157829  | 0.25553  |
| N | 97.5865238  | 94.9351630  | 96.2401255  | -0.66258 |
| H | 100.0991945 | 93.0503885  | 95.7457185  | 0.42251  |
| H | 100.8883578 | 93.1864373  | 98.4077196  | 0.22923  |
| H | 99.6595009  | 91.9040073  | 98.4539791  | 0.22868  |
| H | 97.3796768  | 94.8957088  | 98.3956046  | 0.24033  |
| H | 98.4744637  | 94.4567552  | 94.3321355  | 0.20988  |
| H | 94.8539734  | 93.2939738  | 100.5529718 | 0.22372  |
| C | 93.9909736  | 93.9119736  | 100.3509718 | -0.63243 |
| C | 94.1850768  | 94.8469972  | 99.1923691  | 0.11746  |
| N | 93.7976101  | 96.1861711  | 99.1641005  | -0.56762 |
| C | 94.7187455  | 94.6134913  | 97.9393076  | -0.06840 |
| C | 94.1106872  | 96.7031135  | 97.9539838  | 0.27925  |
| N | 94.6871211  | 95.7733397  | 97.1785800  | -0.70617 |
| H | 93.4213684  | 96.8257812  | 99.8972394  | 0.47076  |
| H | 93.1296844  | 93.2395893  | 100.1807274 | 0.22990  |
| H | 93.7709533  | 94.4780566  | 101.2723014 | 0.23051  |
| H | 95.1380927  | 93.6872183  | 97.5466683  | 0.21296  |
| H | 93.9244769  | 97.7484336  | 97.6947027  | 0.25002  |
| H | 87.3029755  | 97.3189727  | 102.5829712 | 0.23461  |
| C | 87.5759754  | 97.2079727  | 101.5499715 | -0.63061 |
| C | 87.7339110  | 98.4860144  | 100.7935195 | 0.16751  |
| N | 88.8735695  | 99.2595714  | 100.7569825 | -0.58230 |
| C | 86.8381728  | 99.1531074  | 99.9288212  | -0.00946 |
| C | 88.6288316  | 100.3088211 | 99.9126397  | 0.28044  |
| N | 87.4003792  | 100.2717368 | 99.3949453  | -0.52611 |
| H | 89.8057528  | 99.1273421  | 101.1976838 | 0.45857  |
| H | 88.5097268  | 96.6199672  | 101.5324613 | 0.22350  |
| H | 86.7857576  | 96.6032447  | 101.0745006 | 0.22961  |
| H | 85.8170844  | 98.8458436  | 99.6890228  | 0.20946  |
| H | 89.3920340  | 101.0628559 | 99.7116409  | 0.20915  |
| H | 92.2349741  | 97.7739725  | 104.4129707 | 0.23015  |
| C | 92.3029741  | 97.2599727  | 103.4549710 | -0.64632 |
| C | 91.2695969  | 96.2010837  | 103.2719493 | 0.12868  |
| N | 90.9994348  | 95.6794807  | 102.0144395 | -0.59210 |
| C | 90.4332782  | 95.4871506  | 104.1220558 | -0.04902 |
| C | 90.0337148  | 94.7069203  | 102.1627956 | 0.20216  |



|   |             |             |             |          |
|---|-------------|-------------|-------------|----------|
| N | 89.6767683  | 94.5679653  | 103.4268187 | -0.51769 |
| H | 91.3666729  | 96.0609031  | 101.1426609 | 0.41615  |
| H | 92.1912618  | 98.0316508  | 102.6740847 | 0.24381  |
| H | 93.3253599  | 96.8424544  | 103.3671721 | 0.21356  |
| H | 90.3474711  | 95.5966709  | 105.2049123 | 0.21242  |
| H | 89.6394335  | 94.1416230  | 101.3153266 | 0.19956  |
| H | 94.4109735  | 100.7369717 | 100.6889717 | 0.21264  |
| C | 93.3959738  | 100.9249717 | 100.3879718 | -0.70246 |
| C | 92.5919348  | 99.6552322  | 100.7066258 | 0.83269  |
| O | 91.5173949  | 99.7731515  | 101.3784043 | -0.64838 |
| O | 93.0198409  | 98.5181660  | 100.3370342 | -0.71730 |
| H | 93.3774116  | 101.0780079 | 99.2951423  | 0.24050  |
| H | 92.9791352  | 101.7978540 | 100.9116592 | 0.21915  |
| H | 97.9119725  | 98.1829724  | 91.6959743  | 0.23737  |
| C | 97.0639727  | 97.8419725  | 92.2879741  | -0.64491 |
| C | 96.9435190  | 96.3545740  | 92.2752914  | 0.14921  |
| N | 96.0111376  | 95.6731497  | 93.0456186  | -0.55749 |
| C | 97.6143028  | 95.3574584  | 91.5904422  | -0.05919 |
| C | 96.1444423  | 94.3378949  | 92.8210675  | 0.24757  |
| N | 97.1136500  | 94.1103571  | 91.9382101  | -0.62892 |
| H | 95.3582643  | 96.1025456  | 93.7077510  | 0.44148  |
| H | 97.1928981  | 98.2125534  | 93.3218402  | 0.24758  |
| H | 96.1526030  | 98.3155835  | 91.8793111  | 0.23848  |
| H | 98.4150542  | 95.4750780  | 90.8607330  | 0.21676  |
| H | 95.5352747  | 93.5872658  | 93.3254171  | 0.21721  |
| H | 90.7749745  | 101.8069714 | 95.0079733  | 0.22204  |
| C | 90.8569745  | 101.7149714 | 96.0879730  | -0.69931 |
| C | 92.1928100  | 101.0820138 | 96.4465660  | 0.81560  |
| O | 92.3103563  | 100.0887777 | 97.1596299  | -0.64816 |
| O | 93.2110919  | 101.7427112 | 95.8940724  | -0.72958 |
| H | 90.8125622  | 102.7356652 | 96.5066315  | 0.22984  |
| H | 90.0298232  | 101.1131717 | 96.4917510  | 0.22292  |
| H | 99.4778630  | 93.4651197  | 89.1873105  | 0.21781  |
| C | 100.3803819 | 93.4329706  | 89.8211096  | -0.62385 |
| C | 100.1101993 | 92.6719557  | 91.1224049  | -0.20224 |
| N | 99.7298807  | 91.2658567  | 90.9004355  | -0.62351 |
| C | 98.4739162  | 90.8041427  | 90.7264010  | 0.70500  |
| N | 97.4107918  | 91.5799057  | 90.9275094  | -0.80403 |
| N | 98.3163764  | 89.5046713  | 90.3715066  | -0.78740 |
| H | 100.4870393 | 90.6199389  | 90.6837560  | 0.40930  |
| H | 96.4905315  | 91.1809825  | 90.7543896  | 0.40546  |
| H | 97.4108290  | 92.5952717  | 91.3020175  | 0.45687  |
| H | 97.3912473  | 89.1052019  | 90.2418457  | 0.42014  |
| H | 99.1048353  | 88.9328518  | 90.0816239  | 0.41688  |
| H | 101.1959678 | 92.9613401  | 89.2464649  | 0.21947  |
| H | 100.6831872 | 94.4691447  | 90.0480923  | 0.23051  |

|    |             |            |            |         |
|----|-------------|------------|------------|---------|
| H  | 99.3094459  | 93.1511357 | 91.7072059 | 0.22179 |
| H  | 101.0076913 | 92.6566870 | 91.7632795 | 0.22440 |
| Cu | 96.2977323  | 96.3831517 | 96.1169011 | 0.85406 |

Zn-deficient WT-SOD1 with superoxide

|   |             |             |             |          |
|---|-------------|-------------|-------------|----------|
| H | 98.2329724  | 98.8829722  | 98.8599722  | 0.21767  |
| C | 97.5949726  | 98.1169724  | 98.4249724  | -0.62459 |
| C | 96.7439143  | 98.7642481  | 97.3598761  | 0.09665  |
| N | 96.3214065  | 98.1406981  | 96.1858795  | -0.75569 |
| C | 96.1728943  | 100.0311334 | 97.3669948  | -0.05119 |
| C | 95.5127133  | 99.0520149  | 95.5737742  | 0.21463  |
| N | 95.4011228  | 100.2035722 | 96.2399947  | -0.60929 |
| H | 98.2375893  | 97.3294968  | 98.0025824  | 0.20283  |
| H | 96.9806282  | 97.6622670  | 99.2246346  | 0.21950  |
| H | 96.2607207  | 100.8131079 | 98.1239936  | 0.20960  |
| H | 94.9924391  | 98.8467641  | 94.6345932  | 0.17726  |
| H | 94.0917834  | 101.1105238 | 96.0186538  | 0.51025  |
| H | 99.5549720  | 93.2789738  | 99.5349721  | 0.23567  |
| C | 99.8049720  | 92.9989739  | 98.5319723  | -0.63182 |
| C | 99.3096620  | 94.0275045  | 97.5669022  | 0.12991  |
| N | 100.0954338 | 94.6859520  | 96.6263146  | -0.58042 |
| C | 98.0433887  | 94.5361468  | 97.3800849  | -0.02369 |
| C | 99.2982812  | 95.5569930  | 95.9304014  | 0.23752  |
| N | 98.0504572  | 95.4710332  | 96.3665643  | -0.63802 |
| H | 101.1055581 | 94.5936268  | 96.5329580  | 0.42712  |
| H | 100.9008236 | 92.8846237  | 98.4748273  | 0.21934  |
| H | 99.3539362  | 92.0118374  | 98.3271844  | 0.23602  |
| H | 97.1269046  | 94.2975029  | 97.9163661  | 0.23929  |
| H | 99.6614346  | 96.2287401  | 95.1525286  | 0.21713  |
| H | 94.8539734  | 93.2939738  | 100.5529718 | 0.21785  |
| C | 93.9909736  | 93.9119736  | 100.3509718 | -0.63392 |
| C | 94.2082307  | 94.8753836  | 99.2171115  | 0.12425  |
| N | 93.9195868  | 96.2368681  | 99.2612378  | -0.57433 |
| C | 94.7003828  | 94.6618564  | 97.9404909  | -0.08376 |
| C | 94.2511708  | 96.7927820  | 98.0743096  | 0.29378  |
| N | 94.7419351  | 95.8622682  | 97.2494645  | -0.69622 |
| H | 93.5472259  | 96.8650141  | 100.0102000 | 0.48112  |
| H | 93.1358797  | 93.2418930  | 100.1468703 | 0.23129  |
| H | 93.7470758  | 94.4591881  | 101.2769857 | 0.23509  |
| H | 95.0138281  | 93.7328802  | 97.4614190  | 0.22669  |
| H | 94.1213714  | 97.8554319  | 97.8607460  | 0.25232  |
| H | 87.3029755  | 97.3189727  | 102.5829712 | 0.22043  |
| C | 87.5759754  | 97.2079727  | 101.5499715 | -0.62783 |
| C | 87.6497380  | 98.4917037  | 100.7794374 | 0.13145  |
| N | 88.7941615  | 99.2378541  | 100.5990692 | -0.59171 |
| C | 86.6684507  | 99.1840596  | 100.0537355 | -0.04358 |

|   |            |             |             |          |
|---|------------|-------------|-------------|----------|
| C | 88.4668960 | 100.3034763 | 99.8042945  | 0.25475  |
| N | 87.1828970 | 100.3036936 | 99.4561153  | -0.55292 |
| H | 89.7676522 | 99.1068798  | 100.9495045 | 0.46457  |
| H | 88.5414802 | 96.6787037  | 101.5277728 | 0.22183  |
| H | 86.8222721 | 96.5459709  | 101.0895439 | 0.22140  |
| H | 85.6178828 | 98.9022133  | 99.9432410  | 0.19918  |
| H | 89.2219479 | 101.0335375 | 99.5068141  | 0.20356  |
| H | 92.2349741 | 97.7739725  | 104.4129707 | 0.22403  |
| C | 92.3029741 | 97.2599727  | 103.4549710 | -0.65177 |
| C | 91.3366171 | 96.1736004  | 103.1283756 | 0.11818  |
| N | 91.0522860 | 95.9341978  | 101.7900728 | -0.60119 |
| C | 90.6747727 | 95.1614846  | 103.8056718 | -0.06855 |
| C | 90.2490649 | 94.8205966  | 101.7264568 | 0.19820  |
| N | 90.0027071 | 94.3301873  | 102.9295940 | -0.53806 |
| H | 91.3429613 | 96.5616212  | 101.0346242 | 0.43097  |
| H | 92.2121926 | 98.0519685  | 102.6920137 | 0.25047  |
| H | 93.3425559 | 96.8806552  | 103.3805429 | 0.21189  |
| H | 90.6529404 | 94.9900798  | 104.8840326 | 0.20495  |
| H | 89.8720763 | 94.4253751  | 100.7804529 | 0.19784  |
| H | 94.4109735 | 100.7369717 | 100.6889717 | 0.20333  |
| C | 93.3959738 | 100.9249717 | 100.3879718 | -0.70430 |
| C | 92.5864038 | 99.6363022  | 100.6637850 | 0.85876  |
| O | 91.4099734 | 99.7498828  | 101.1204429 | -0.73497 |
| O | 93.1417244 | 98.5100033  | 100.4488437 | -0.79251 |
| H | 93.3767176 | 101.1093984 | 99.3000811  | 0.23542  |
| H | 92.9623701 | 101.7816848 | 100.9257259 | 0.21036  |
| H | 97.9119725 | 98.1829724  | 91.6959743  | 0.22869  |
| C | 97.0639727 | 97.8419725  | 92.2879741  | -0.64418 |
| C | 96.4992875 | 96.5678079  | 91.7425061  | 0.13003  |
| N | 95.2781985 | 96.0612957  | 92.1520536  | -0.56613 |
| C | 96.9593696 | 95.6357253  | 90.8237017  | -0.08621 |
| C | 95.0625363 | 94.8810109  | 91.5015324  | 0.23615  |
| N | 96.0660086 | 94.5860175  | 90.6848412  | -0.59545 |
| H | 94.6896719 | 96.4480906  | 92.8891442  | 0.43579  |
| H | 97.3858276 | 97.7260127  | 93.3411848  | 0.22985  |
| H | 96.3098955 | 98.6491675  | 92.2778961  | 0.23631  |
| H | 97.8747963 | 95.6919925  | 90.2314343  | 0.20258  |
| H | 94.1690133 | 94.2781390  | 91.6734675  | 0.20903  |
| H | 90.7749745 | 101.8069714 | 95.0079733  | 0.21744  |
| C | 90.8569745 | 101.7149714 | 96.0879730  | -0.70311 |
| C | 92.1788938 | 101.0363654 | 96.4332315  | 0.83567  |
| O | 92.2755887 | 100.0858234 | 97.2023055  | -0.65140 |
| O | 93.2026114 | 101.6094863 | 95.7981463  | -0.75370 |
| H | 90.8499735 | 102.7357954 | 96.5092680  | 0.22697  |
| H | 90.0156624 | 101.1403662 | 96.5020106  | 0.22588  |
| H | 99.4782721 | 93.4649738  | 89.1870750  | 0.21186  |

|    |             |            |            |          |
|----|-------------|------------|------------|----------|
| C  | 100.3806718 | 93.4328738 | 89.8210748 | -0.61394 |
| C  | 99.9406715  | 93.6399908 | 91.2798853 | -0.20306 |
| N  | 98.7053047  | 92.8813444 | 91.5231620 | -0.64806 |
| C  | 98.0194338  | 92.8560200 | 92.6913099 | 0.74145  |
| N  | 98.5889181  | 93.1743682 | 93.8639840 | -0.81223 |
| N  | 96.7460122  | 92.4239001 | 92.6957859 | -0.80972 |
| H  | 98.1019335  | 92.7783135 | 90.7036959 | 0.42084  |
| H  | 97.9244682  | 93.3474299 | 94.6516489 | 0.44890  |
| H  | 99.5311084  | 93.5450538 | 93.9086905 | 0.40349  |
| H  | 96.2409003  | 92.6276820 | 93.5906266 | 0.44212  |
| H  | 96.2290321  | 92.6113739 | 91.8318226 | 0.41771  |
| H  | 100.8544315 | 92.4473354 | 89.6807096 | 0.22159  |
| H  | 101.0801582 | 94.2195718 | 89.5004680 | 0.22977  |
| H  | 99.7615294  | 94.7146926 | 91.4843682 | 0.20677  |
| H  | 100.7264641 | 93.2886068 | 91.9740656 | 0.20655  |
| Cu | 96.1605326  | 96.2224443 | 95.8655148 | 1.16170  |
| O  | 95.7759552  | 94.6957893 | 94.7902498 | -0.36352 |
| O  | 96.1820762  | 93.4726504 | 95.1564796 | -0.38047 |

#### Zn-deficient D124N-SOD1

|   |             |             |            |          |
|---|-------------|-------------|------------|----------|
| H | 98.2269724  | 99.4019721  | 97.8119725 | 0.24377  |
| C | 97.7139726  | 99.0449722  | 96.9299728 | -0.64338 |
| C | 96.5199510  | 99.8931618  | 96.5586397 | 0.12408  |
| N | 95.6844725  | 99.4998419  | 95.5032084 | -0.71701 |
| C | 96.0192539  | 101.0817961 | 97.0555244 | -0.00810 |
| C | 94.7292868  | 100.4364215 | 95.3834663 | 0.28179  |
| N | 94.9064060  | 101.4021604 | 96.3004352 | -0.55727 |
| H | 97.3991257  | 98.0024732  | 97.1250110 | 0.22338  |
| H | 98.4450378  | 99.0269151  | 96.0986309 | 0.21314  |
| H | 96.3363937  | 101.6972842 | 97.8942213 | 0.24425  |
| H | 93.9189173  | 100.4323544 | 94.6559652 | 0.22306  |
| H | 94.2564098  | 102.2430475 | 96.3602228 | 0.47547  |
| H | 99.3489721  | 93.6689737  | 96.4639729 | 0.24324  |
| C | 99.4629721  | 93.8539736  | 95.3979732 | -0.63960 |
| C | 98.2637918  | 94.5873846  | 94.8924430 | 0.15082  |
| N | 97.0518751  | 93.9841124  | 94.5795750 | -0.55716 |
| C | 98.0248458  | 95.9364764  | 94.7551096 | -0.05323 |
| C | 96.1330394  | 94.9403086  | 94.2856652 | 0.28908  |
| N | 96.6968875  | 96.1462620  | 94.3881756 | -0.68301 |
| H | 96.8736624  | 92.9802265  | 94.5818695 | 0.44235  |
| H | 99.6086030  | 92.8878998  | 94.8857811 | 0.23512  |
| H | 100.3679400 | 94.4635925  | 95.2540130 | 0.24238  |
| H | 98.7086954  | 96.7653336  | 94.9294060 | 0.23059  |
| H | 95.0893615  | 94.7395569  | 94.0470100 | 0.22805  |
| H | 94.5719734  | 92.4389740  | 96.9919728 | 0.20970  |
| C | 93.5879737  | 92.8439739  | 97.1979727 | -0.64680 |

|   |             |             |             |          |
|---|-------------|-------------|-------------|----------|
| C | 93.1730710  | 94.0801152  | 96.4608544  | 0.11880  |
| N | 92.7442667  | 94.0820078  | 95.1352279  | -0.59695 |
| C | 92.9542674  | 95.3832384  | 96.8830863  | -0.04955 |
| C | 92.2814733  | 95.3400217  | 94.8341192  | 0.21532  |
| N | 92.3997133  | 96.1535843  | 95.8739892  | -0.58950 |
| H | 92.6572064  | 93.2569338  | 94.5429742  | 0.42611  |
| H | 92.8608647  | 92.0327035  | 97.0156089  | 0.23742  |
| H | 93.5358388  | 93.0448335  | 98.2794093  | 0.26112  |
| H | 93.1336977  | 95.7887325  | 97.8793500  | 0.22471  |
| H | 91.8649665  | 95.5949024  | 93.8573740  | 0.20970  |
| H | 87.2269755  | 98.1709724  | 98.2939724  | 0.23987  |
| C | 87.9269753  | 98.0869725  | 97.4819726  | -0.63072 |
| C | 89.2642730  | 98.6615353  | 97.8474096  | 0.11495  |
| N | 90.4615586  | 98.3397175  | 97.2046267  | -0.57540 |
| C | 89.6259009  | 99.5899493  | 98.8122212  | -0.04448 |
| C | 91.4662998  | 99.0484532  | 97.7895554  | 0.25219  |
| N | 90.9766124  | 99.8314455  | 98.7403407  | -0.44725 |
| H | 90.6451737  | 97.6236093  | 96.4926377  | 0.44481  |
| H | 88.0148865  | 97.0138695  | 97.2287170  | 0.21268  |
| H | 87.4923702  | 98.5925285  | 96.5995064  | 0.23432  |
| H | 88.9873657  | 100.0903861 | 99.5406204  | 0.22996  |
| H | 92.5173584  | 98.9588025  | 97.5165063  | 0.22211  |
| H | 90.5259746  | 96.5349729  | 101.0659716 | 0.23852  |
| C | 90.7349745  | 96.3349729  | 100.0239719 | -0.63227 |
| C | 90.7891146  | 94.8712247  | 99.7148847  | 0.10861  |
| N | 90.1944570  | 94.3317197  | 98.5828716  | -0.58292 |
| C | 91.3774622  | 93.7786749  | 100.3367137 | -0.06397 |
| C | 90.4406406  | 92.9805621  | 98.5761350  | 0.20642  |
| N | 91.1575752  | 92.6170434  | 99.6236011  | -0.53041 |
| H | 89.6585999  | 94.8540590  | 97.8934150  | 0.41046  |
| H | 89.9385570  | 96.8293752  | 99.4456530  | 0.21154  |
| H | 91.6797675  | 96.8556314  | 99.7809181  | 0.22145  |
| H | 91.9362011  | 93.7732909  | 101.2747635 | 0.21514  |
| H | 90.0578078  | 92.3209842  | 97.7941456  | 0.19783  |
| H | 95.0579733  | 99.6309720  | 101.6499715 | 0.22678  |
| C | 94.1499736  | 100.2139719 | 101.7299714 | -0.68492 |
| C | 93.3374371  | 100.2165689 | 100.4067778 | 0.80474  |
| O | 92.1590412  | 99.7171937  | 100.6340289 | -0.37253 |
| O | 93.7828413  | 100.6637461 | 99.3447110  | -0.68890 |
| H | 94.4290980  | 101.2635227 | 101.9266963 | 0.23902  |
| H | 93.5504694  | 99.8373509  | 102.5717317 | 0.23167  |
| H | 99.4059721  | 101.6819714 | 91.7499742  | 0.24097  |
| C | 98.7729723  | 100.8119717 | 91.7629742  | -0.63798 |
| C | 99.5130372  | 99.6249642  | 91.2323869  | 0.13926  |
| N | 99.1424089  | 98.3122870  | 91.4953007  | -0.57008 |
| C | 100.6098288 | 99.5092705  | 90.3970407  | -0.04353 |

|    |             |             |            |          |
|----|-------------|-------------|------------|----------|
| C  | 99.9948576  | 97.4779414  | 90.8318968 | 0.25196  |
| N  | 100.8973146 | 98.1780682  | 90.1558979 | -0.61646 |
| H  | 98.3551100  | 98.0232122  | 92.0763998 | 0.42699  |
| H  | 98.4424222  | 100.6472848 | 92.8045290 | 0.22518  |
| H  | 97.8736884  | 101.0301947 | 91.1574975 | 0.23730  |
| H  | 101.2000965 | 100.3130136 | 89.9553953 | 0.22437  |
| H  | 99.9181380  | 96.3905430  | 90.8716052 | 0.21009  |
| H  | 90.8929745  | 104.9439705 | 95.2949732 | 0.23899  |
| C  | 90.9419745  | 104.6169706 | 96.3259730 | -0.68804 |
| C  | 91.9651880  | 103.5155644 | 96.6282361 | 0.71933  |
| O  | 93.0502479  | 103.4117167 | 96.0203484 | -0.69410 |
| N  | 91.6451603  | 102.6962326 | 97.6590278 | -0.80814 |
| H  | 92.3007557  | 101.9944386 | 98.0220169 | 0.42667  |
| H  | 90.7588695  | 102.7709169 | 98.1513869 | 0.40394  |
| H  | 91.2297493  | 105.4981160 | 96.9296053 | 0.24600  |
| H  | 89.9304649  | 104.3165006 | 96.6478885 | 0.21744  |
| H  | 106.2576469 | 98.0257615  | 90.9526467 | 0.21887  |
| C  | 105.4435509 | 97.3045899  | 91.1455537 | -0.62337 |
| C  | 104.2378441 | 97.5782764  | 90.2497224 | -0.20068 |
| N  | 104.6155587 | 97.4479772  | 88.8309880 | -0.63247 |
| C  | 103.7549846 | 97.3462602  | 87.8009740 | 0.72723  |
| N  | 102.4371672 | 97.4009740  | 87.9999971 | -0.81538 |
| N  | 104.2529198 | 97.1690732  | 86.5541021 | -0.79688 |
| H  | 105.6021785 | 97.5676512  | 88.6046726 | 0.41615  |
| H  | 101.8224436 | 97.2206205  | 87.2091746 | 0.40889  |
| H  | 101.9468125 | 97.6835028  | 88.9107901 | 0.46080  |
| H  | 103.6509840 | 97.2039075  | 85.7363388 | 0.42388  |
| H  | 105.2396822 | 96.9856285  | 86.3939163 | 0.42340  |
| H  | 105.8310713 | 96.2824244  | 90.9954128 | 0.22145  |
| H  | 105.1516324 | 97.4114492  | 92.2026093 | 0.23764  |
| H  | 103.8316390 | 98.5903909  | 90.4342952 | 0.21751  |
| H  | 103.4241903 | 96.8611591  | 90.4531584 | 0.22011  |
| Cu | 95.9658399  | 97.8352005  | 94.7228107 | 0.68150  |

Zn-deficient D124N-SOD1 with superoxide

|   |            |             |            |          |
|---|------------|-------------|------------|----------|
| H | 98.2269724 | 99.4019721  | 97.8119725 | 0.22955  |
| C | 97.7139726 | 99.0449722  | 96.9299728 | -0.63405 |
| C | 96.6425677 | 100.0071213 | 96.4701159 | 0.12456  |
| N | 96.0890795 | 99.8771550  | 95.1927158 | -0.73378 |
| C | 96.0151402 | 101.0740349 | 97.0908723 | -0.02303 |
| C | 95.1684644 | 100.8456684 | 95.0631814 | 0.28136  |
| N | 95.0990261 | 101.5857942 | 96.1861239 | -0.56553 |
| H | 97.2830731 | 98.0512035  | 97.1516110 | 0.22432  |
| H | 98.4597155 | 98.9104694  | 96.1255247 | 0.21209  |
| H | 96.0890678 | 101.4699419 | 98.1020743 | 0.24551  |
| H | 94.5558042 | 101.0221310 | 94.1800259 | 0.22226  |

|   |             |             |             |          |
|---|-------------|-------------|-------------|----------|
| H | 94.4464403  | 102.4147794 | 96.2892989  | 0.47128  |
| H | 99.3489721  | 93.6689737  | 96.4639729  | 0.23438  |
| C | 99.4629721  | 93.8539736  | 95.3979732  | -0.63575 |
| C | 98.3590559  | 94.7637459  | 94.9462346  | 0.13031  |
| N | 97.0213156  | 94.3853379  | 94.9581102  | -0.56644 |
| C | 98.3393384  | 96.0911103  | 94.5634152  | -0.04131 |
| C | 96.2543038  | 95.4505980  | 94.6021971  | 0.28384  |
| N | 97.0301160  | 96.5056753  | 94.3571298  | -0.67789 |
| H | 96.6619320  | 93.4713854  | 95.2288096  | 0.43275  |
| H | 99.4505314  | 92.8849024  | 94.8684873  | 0.22519  |
| H | 100.4395045 | 94.3336178  | 95.2329776  | 0.23509  |
| H | 99.1761679  | 96.7767366  | 94.4381165  | 0.23020  |
| H | 95.1655283  | 95.4275759  | 94.5529351  | 0.22631  |
| H | 94.5719734  | 92.4389740  | 96.9919728  | 0.20000  |
| C | 93.5879737  | 92.8439739  | 97.1979727  | -0.64501 |
| C | 93.2389074  | 94.1931293  | 96.6429666  | 0.10189  |
| N | 92.8169505  | 94.3992253  | 95.3300101  | -0.60011 |
| C | 93.0487553  | 95.4266861  | 97.2506720  | -0.04313 |
| C | 92.3820791  | 95.6995008  | 95.2206657  | 0.21361  |
| N | 92.5122680  | 96.3461125  | 96.3680790  | -0.56247 |
| H | 92.7354017  | 93.6795949  | 94.6136326  | 0.41942  |
| H | 92.8574017  | 92.0931118  | 96.8451805  | 0.22670  |
| H | 93.4709760  | 92.8722935  | 98.2927195  | 0.26267  |
| H | 93.2410836  | 95.6837722  | 98.2924481  | 0.22778  |
| H | 91.9860071  | 96.1095255  | 94.2889785  | 0.20910  |
| H | 87.2269755  | 98.1709724  | 98.2939724  | 0.22885  |
| C | 87.9269753  | 98.0869725  | 97.4819726  | -0.62494 |
| C | 88.9932596  | 99.1260503  | 97.6624443  | 0.10288  |
| N | 90.3439330  | 98.9563410  | 97.3823238  | -0.58292 |
| C | 88.8962668  | 100.4328527 | 98.1177489  | -0.04205 |
| C | 90.9815508  | 100.1271004 | 97.6818213  | 0.26141  |
| N | 90.1282772  | 101.0436897 | 98.1227959  | -0.59329 |
| H | 90.8264017  | 98.1041734  | 97.0767879  | 0.43932  |
| H | 88.3475317  | 97.0652677  | 97.4980019  | 0.19898  |
| H | 87.3780331  | 98.2032691  | 96.5285423  | 0.22427  |
| H | 87.9939193  | 100.9556788 | 98.4410467  | 0.20973  |
| H | 92.0641316  | 100.2354066 | 97.6217088  | 0.21391  |
| H | 90.5259746  | 96.5349729  | 101.0659716 | 0.23225  |
| C | 90.7349745  | 96.3349729  | 100.0239719 | -0.63793 |
| C | 90.8401577  | 94.8660099  | 99.7561633  | 0.11692  |
| N | 90.1698637  | 94.2469058  | 98.7135454  | -0.57834 |
| C | 91.5507269  | 93.8348258  | 100.3555053 | -0.07093 |
| C | 90.4950689  | 92.9133945  | 98.7278980  | 0.20568  |
| N | 91.3322025  | 92.6329704  | 99.7112619  | -0.54179 |
| H | 89.5496070  | 94.7145438  | 98.0559366  | 0.41416  |
| H | 89.9178309  | 96.7882958  | 99.4389133  | 0.21161  |

|   |             |             |             |          |
|---|-------------|-------------|-------------|----------|
| H | 91.6559264  | 96.8902589  | 99.7683969  | 0.24535  |
| H | 92.2033765  | 93.9029717  | 101.2282555 | 0.21142  |
| H | 90.0837877  | 92.2039141  | 98.0065815  | 0.19552  |
| H | 95.0579733  | 99.6309720  | 101.6499715 | 0.21948  |
| C | 94.1499736  | 100.2139719 | 101.7299714 | -0.71218 |
| C | 93.5408739  | 100.2327361 | 100.3226825 | 0.81641  |
| O | 92.7783976  | 99.2801853  | 99.9796096  | -0.55842 |
| O | 93.8512780  | 101.1444209 | 99.4951906  | -0.66298 |
| H | 94.4013161  | 101.2351506 | 102.0584182 | 0.22397  |
| H | 93.4699868  | 99.7248233  | 102.4451140 | 0.22350  |
| H | 99.4059721  | 101.6819714 | 91.7499742  | 0.23074  |
| C | 98.7729723  | 100.8119717 | 91.7629742  | -0.64039 |
| C | 99.4960540  | 99.5336546  | 91.4786964  | 0.13401  |
| N | 98.8237601  | 98.3240814  | 91.4603951  | -0.59301 |
| C | 100.8160855 | 99.2086350  | 91.1948398  | -0.07285 |
| C | 99.7300432  | 97.3524204  | 91.1630700  | 0.20083  |
| N | 100.9555683 | 97.8441597  | 90.9984176  | -0.61667 |
| H | 97.7789281  | 98.1868096  | 91.4980234  | 0.44969  |
| H | 98.2846514  | 100.7665626 | 92.7556173  | 0.23255  |
| H | 97.9653395  | 100.9708744 | 91.0243879  | 0.23260  |
| H | 101.6677226 | 99.8892456  | 91.1310752  | 0.20774  |
| H | 99.4395646  | 96.3015909  | 91.0939739  | 0.18396  |
| H | 90.8929745  | 104.9439705 | 95.2949732  | 0.22355  |
| C | 90.9419745  | 104.6169706 | 96.3259730  | -0.68673 |
| C | 92.1662470  | 103.7517648 | 96.6944358  | 0.71640  |
| O | 93.2087979  | 103.7033669 | 96.0048715  | -0.70081 |
| N | 92.0552168  | 103.1211668 | 97.8881104  | -0.83961 |
| H | 92.8293051  | 102.5314177 | 98.2191901  | 0.41326  |
| H | 91.1359414  | 102.7756573 | 98.2136749  | 0.43395  |
| H | 90.9635793  | 105.5145920 | 96.9700167  | 0.23397  |
| H | 90.0170919  | 104.0663034 | 96.5738509  | 0.22371  |
| H | 106.2573702 | 98.0257725  | 90.9527745  | 0.24120  |
| C | 105.4432704 | 97.3045727  | 91.1455744  | -0.61900 |
| C | 104.5028668 | 97.3411563  | 89.9404508  | -0.21038 |
| N | 103.5735442 | 96.1999021  | 89.9484190  | -0.60851 |
| C | 102.4073565 | 96.1542298  | 89.3004277  | 0.75403  |
| N | 101.5539448 | 95.1313447  | 89.5406698  | -0.79030 |
| N | 102.1303098 | 97.0169910  | 88.3017532  | -0.78183 |
| H | 103.8206503 | 95.3966825  | 90.5249040  | 0.41875  |
| H | 100.6919299 | 95.0789312  | 89.0033533  | 0.42069  |
| H | 101.5096641 | 94.7485387  | 90.4824547  | 0.41872  |
| H | 101.1568313 | 97.2979872  | 88.1853821  | 0.42731  |
| H | 102.8039320 | 97.7490147  | 88.0894509  | 0.42187  |
| H | 105.9135860 | 96.3104912  | 91.2527648  | 0.21414  |
| H | 104.9236077 | 97.5653853  | 92.0811738  | 0.22564  |
| H | 105.0911672 | 97.3199088  | 89.0030167  | 0.21651  |



|    |             |            |            |          |
|----|-------------|------------|------------|----------|
| H  | 103.8987895 | 98.2659330 | 89.9555534 | 0.22483  |
| Cu | 96.3364120  | 98.3163281 | 94.1026794 | 0.88332  |
| O  | 95.4388986  | 98.3160144 | 92.3435737 | -0.31638 |
| O  | 96.1108376  | 97.9325276 | 91.2958109 | -0.23905 |
